# Supplementary material for: Amorphous/crystalline heterostructure design enables highly efficient adsorption–diffusion–conversion of polysulfides for lithium–sulfur batteries
Source: Royal Society of Chemistry journal article supplement (doi:10.1039/d3ta03526c), 2023-01-01
Supplement: d3ta03526c1.pdf [file d3ta03526c1.pdf]

## Supporting Information

### **Amorphous/crystalline heterostructure design enables highly efficient adsorption-diffusion-conversion of polysulfides for lithium–sulfur batteries**

Xiangpeng Wu,<sup>a,1</sup> Zewei Shen,<sup>a,1</sup> Daoping Cai,<sup>a,\*</sup> Ban Fei,<sup>a</sup> Mincai Zhao,<sup>a</sup> Junjie Fu,<sup>a</sup>

Qidi Chen,<sup>a</sup> and Hongbing Zhan<sup>a\*</sup>

<sup>a</sup> College of Materials Science and Engineering, Fuzhou University, Fujian 350108, China.

\*Corresponding authors: Daoping Cai and Hongbing Zhan.

E-mail addresses: [dpcai@fzu.edu.cn](mailto:dpcai@fzu.edu.cn) and [hbzhan@fzu.edu.cn](mailto:hbzhan@fzu.edu.cn).

<sup>1</sup> These authors contribute equally to this work.

## **Experimental Section**

### **1.1. Synthesis of BiOBr nanosheets**

In a typical synthesis, 1 g of  $\text{Bi}(\text{NO}_3)_3 \cdot 5\text{H}_2\text{O}$ , 0.4 mL of HBr and 0.7 g of polyethylene glycol (PEG) were dissolved in 10 mL of ethylene glycol, after stirring for 10 minutes, a homogeneous solution was obtained. After that, the mixture was transferred into a Teflon-lined stainless steel autoclave (50 mL) and sealed tightly, the autoclave was maintained at a temperature of 160 °C for 6 h. When the reaction was completed, the resulting product was collected by centrifugation, washed with ethanol and water for at least three times and then dried at 70 °C overnight.

### **1.2. Synthesis of $\text{Bi}_2\text{Se}_3$ nanosheets**

20 mg of BiOBr nanosheets, 20 mg of 1,10-phenanthroline and 50 mg of  $\text{SeO}_2$  were mixed in 10 mL oleylamine in the 25 mL round flask under continuous magnetic agitation and then heated to 180 °C within 3 h to get a black solution. The obtained sample was collected by filtration and washed with ethanol and hexyl hydride several times, then dried at 70 °C overnight.

### **1.3. Synthesis of c- $\text{Bi}_2\text{Se}_3$ /a- $\text{BiO}_x$ nanosheets**

20 mg of  $\text{Bi}_2\text{Se}_3$  nanosheets was dispersed in 16 mL of deionized water. Then 1 mL of hydrogen peroxide ( $\text{H}_2\text{O}_2$ ) was added to the solution under 30 min stirring. The product was collected after centrifugation, thoroughly washed with deionized water and ethanol several times, and finally dried in an oven at 70 °C for overnight. The procedure for synthesizing the c- $\text{Bi}_2\text{Se}_3$ /a- $\text{BiO}_x$ -5 product was similar to that of c- $\text{Bi}_2\text{Se}_3$ /a- $\text{BiO}_x$  except that the amount of  $\text{H}_2\text{O}_2$  was adjusted to 5 mL.

### **1.3. Synthesis of KB/S and CNT/S cathodes**

The Ketjen black (KB)/S composite was prepared by the melt-diffusion method. The KB mixed with sublimed sulfur (weight ratio of 1:3) were placed into a sealed glass bottle and the KB/S composite was obtained after heating at 155 °C for 12 h. The sulfur cathode was prepared by the slurry-coating method. The slurry was prepared by mixing KB/S composite, KB, and polyvinylidene fluoride (PVDF) with a mass ratio of 8:1:1 in 1-methyl-2-pyrrolidinone (NMP) solvent. The slurry was then spreaded on carbon

coated aluminum foil and dried in a vacuum oven at 60 °C for 12 h, then punched into circle disks with a parameter of 12 mm. The areal sulfur loading for each disk was controlled around 1.0 mg cm<sup>-2</sup>. The CNT/S composite was prepared for high sulfur loading battery via the same strategy.

#### **1.4. Preparation of the modified separator**

The c-Bi<sub>2</sub>Se<sub>3</sub>/a-BiO<sub>x</sub> layer uniformly coated on a separator was obtained by the vacuum filtration method. 4.2 mg of c-Bi<sub>2</sub>Se<sub>3</sub>/a-BiO<sub>x</sub>, 1.2 mg of PVDF and 0.6 mg of rGO were dispersed in 10 mL NMP by sonication for 2 h to obtain a homogeneous suspension, which was filtered through a polypropylene (PP) membrane (Celgard 2500). The obtained modified separator was dried at 60 °C overnight under vacuum. Eventually, the modified separator was cut into discs with a diameter of 19 mm. The c-Bi<sub>2</sub>Se<sub>3</sub>/a-BiO<sub>x</sub>-5 and Bi<sub>2</sub>Se<sub>3</sub> modified separators were prepared using the same method. The mass loadings of the separator modifiers was around 0.45 mg cm<sup>-2</sup>.

#### **1.5. Lithium polysulfide (Li<sub>2</sub>S<sub>6</sub>) solution and visualized adsorption test**

0.1 M Li<sub>2</sub>S<sub>6</sub> solution was prepared by dissolving S and Li<sub>2</sub>S (the molar ratio is 5:1) in a mixed solvent of 1,2-dimethoxyethane (DME) and 1,3-dioxolane (DOL) (1:1 in volume) under vigorous stirring at 70 °C for 24 h. Then 20 mg of c-Bi<sub>2</sub>Se<sub>3</sub>/a-BiO<sub>x</sub>, c-Bi<sub>2</sub>Se<sub>3</sub>/a-BiO<sub>x</sub>-5 and Bi<sub>2</sub>Se<sub>3</sub> were put into 3 mL Li<sub>2</sub>S<sub>6</sub> solution (5 mM) for visualized adsorption test. All the above operations were carried out in an argon-filled glove box.

#### **1.6. Symmetric cell assembly and kinetic evaluation of polysulfide conversion**

0.2 M Li<sub>2</sub>S<sub>6</sub> electrolyte was prepared by same method as above. The electrodes for symmetric cells were prepared by mixing active materials (c-Bi<sub>2</sub>Se<sub>3</sub>/a-BiO<sub>x</sub>, c-Bi<sub>2</sub>Se<sub>3</sub>/a-BiO<sub>x</sub>-5 and Bi<sub>2</sub>Se<sub>3</sub>) and PVDF with a weight ratio of 9:1 in NMP solvent followed by coating the slurry onto aluminum foil. Two identical electrodes were used as the working and the counter electrodes with a mass loading of about 1.0 mg cm<sup>-2</sup>, and 40 μL of Li<sub>2</sub>S<sub>6</sub> (0.2 M) was used as electrolyte. The cyclic voltammetry (CV) measurements of the symmetric cells were measured by electrochemical workstation (CHI660E) with a voltage window between -1.0 ~ 1.0 V at 5 mV s<sup>-1</sup>.

#### **1.7. Li<sub>2</sub>S nucleation and decomposition measurements**

For the study of liquid-solid conversion kinetics,  $\text{Li}_2\text{S}_8$  solution (0.5 M) was prepared by mixing sulfur and  $\text{Li}_2\text{S}$  (molar ratio of 7:1) and dissolving the mixture in DME and DOL (1:1 in volume) solution containing 1.0 M LiTFSI under vigorous stirring for 24 h. Nucleation and decomposition experiments of  $\text{Li}_2\text{S}$  on different reactive surfaces were investigated in 2032-type coin cells with PP separator. Carbon papers (CP) were used as current collector to load the different materials. c- $\text{Bi}_2\text{Se}_3/\text{a-BiO}_x$ , c- $\text{Bi}_2\text{Se}_3/\text{a-BiO}_x$ -5 and  $\text{Bi}_2\text{Se}_3$  on CP were applied as cathode and Li foil was used as anode. 20  $\mu\text{L}$  of  $\text{Li}_2\text{S}_8$  (0.5 M) was dropped onto the cathode, and blank electrolyte with 1.0 M LiTFSI and 1 wt%  $\text{LiNO}_3$  but without  $\text{Li}_2\text{S}_8$  was dropped onto anode side.

For  $\text{Li}_2\text{S}$  nucleation, the cells were firstly potentiostatically discharged to 2.19 V at 0.112 mA and then potentiostatically discharged at 2.05 V until the discharging current decreased to  $10^{-5}$  A. For  $\text{Li}_2\text{S}$  decomposition, the assembled cells were charged galvanostatically to 1.70 V at 0.112 mA for complete transformation of LiPSs into solid  $\text{Li}_2\text{S}$  and then charged potentiostatically at 2.35 V until the charge current was below  $10^{-5}$  A.

### 1.8. Materials characterization

The information of composition, microstructure and morphology of the products were analyzed by X-ray diffractometer (XRD, Rigaku, D/max-Ultima III diffractometer, Cu  $\text{K}\alpha$  radiation,  $\lambda = 0.15418$  nm), X-ray photoelectron spectroscopy (XPS, Thermo Fisher Scientific, ESCALAB 250), field emission scanning electron microscope (FESEM, Germany, Zeiss Supra 55), high-resolution transmission electron microscope (HRTEM, FEI, Talos F200i), and the thermogravimetric analysis (TGA, NETZSCH, STA449-F5).

### 1.9. Electrochemical measurements

CR2032 coin cells were assembled in an Ar-filled glovebox ( $<0.5$  ppm of  $\text{O}_2$ ,  $<0.5$  ppm of  $\text{H}_2\text{O}$ ) by using the KB/S or CNT/S cathodes, modified PP separators, and Li foil anodes. The electrolyte was 1.0 M LiTFSI in DME: DOL (1:1 in volume) with  $\text{LiNO}_3$  (1 wt%). Galvanostatic charge-discharge tests were conducted on LAND CT2001A within a potential range from 1.7 to 2.8 V. The specific capacity was

calculated based on the weight of sulfur in each cell ( $1\text{ C} = 1675\text{ mA g}^{-1}$ ). CV curves and electrochemical impedance spectroscopy (EIS) were measured by an electrochemical workstation (CHI660E). EIS spectra were tested with the frequency range from  $10^{-2}$  to  $10^5$  Hz.

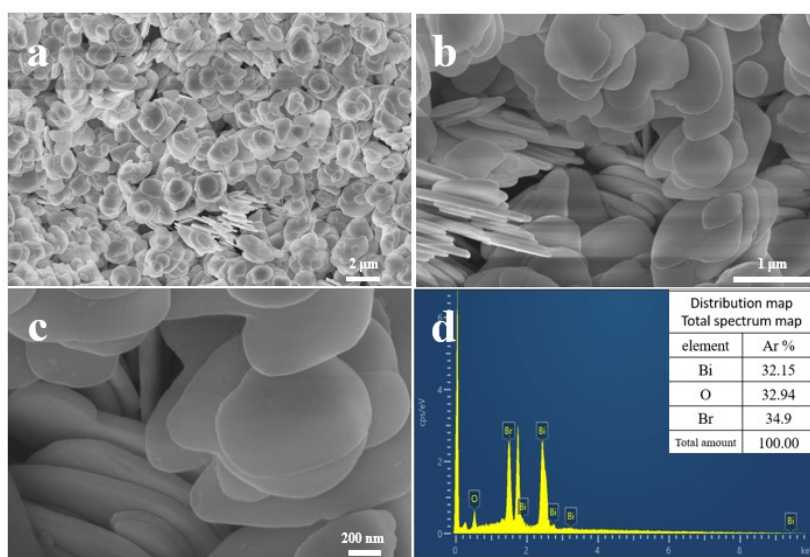

**Fig. S1.** (a-c) SEM images and (d) EDS spectrum of the BiOBr nanosheets.

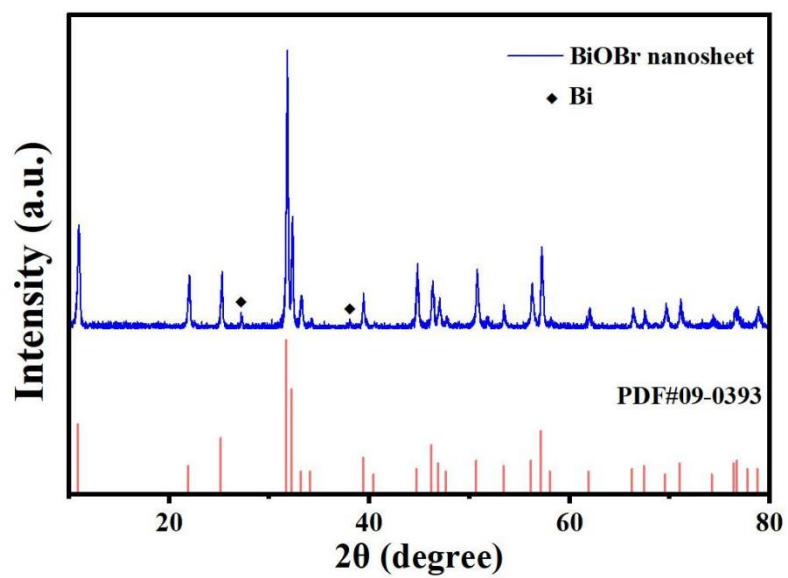

**Fig. S2.** XRD pattern of the BiOBr nanosheets.

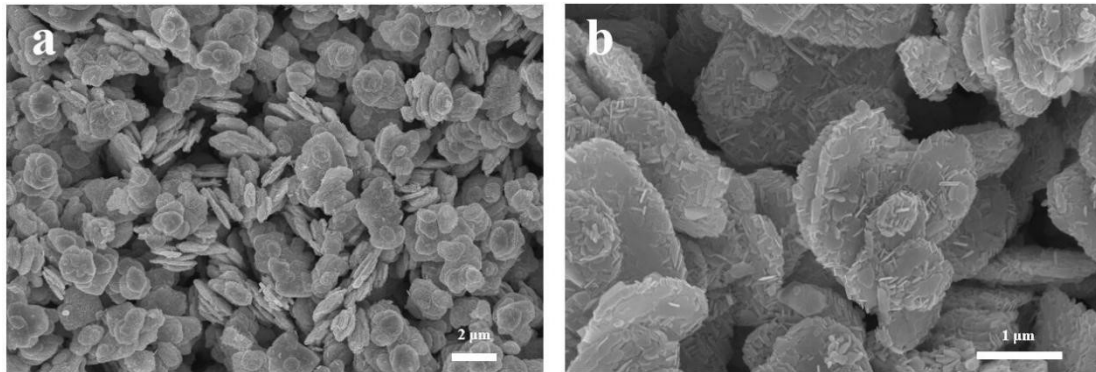

**Fig. S3.** (a, b) SEM images of the  $\text{Bi}_2\text{Se}_3$  nanosheets.

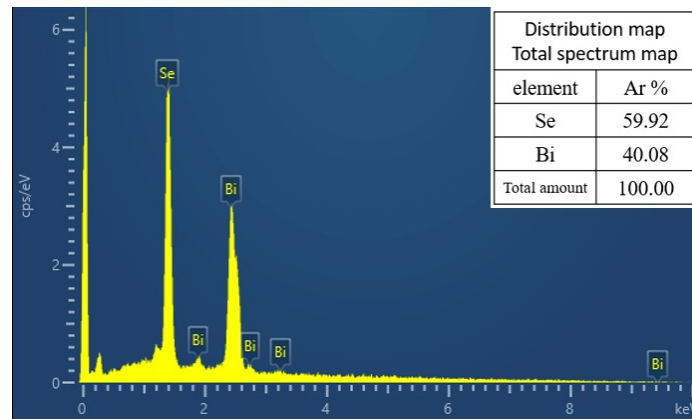

**Fig. S4.** EDS spectrum of the  $\text{Bi}_2\text{Se}_3$  nanosheets.

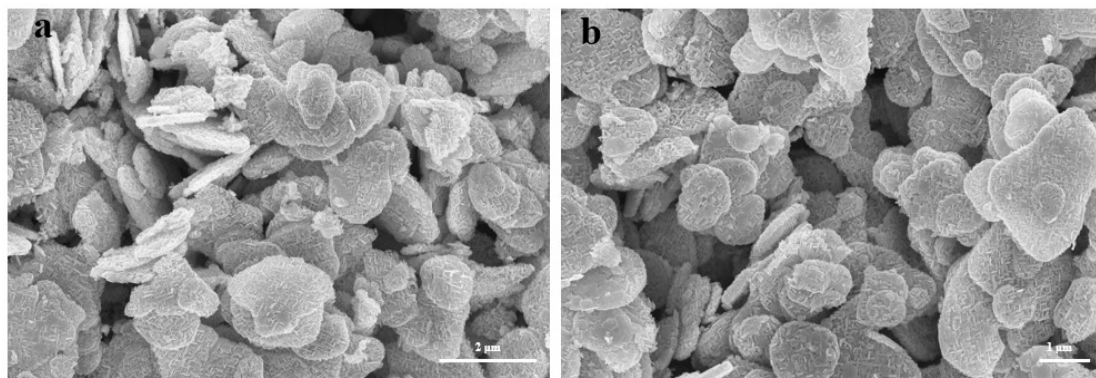

**Fig. S5.** (a, b) SEM images of the  $\text{c-Bi}_2\text{Se}_3/\text{a-BiO}_x$  heterostructure.

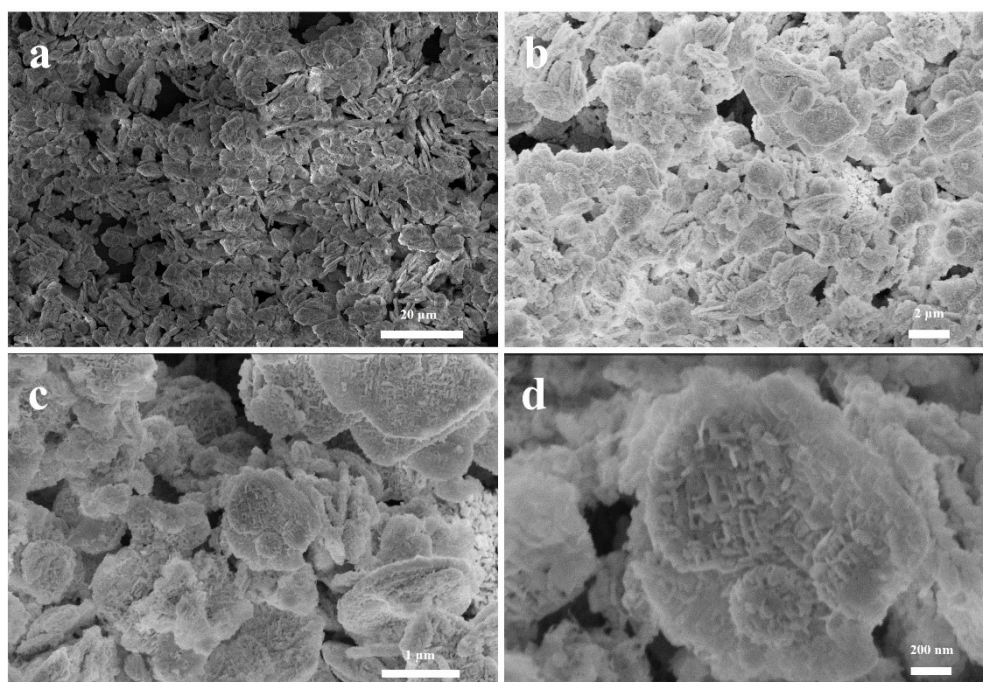

**Fig. S6.** (a-d) SEM images of the c-Bi<sub>2</sub>Se<sub>3</sub>/a-BiO<sub>x</sub>-5.

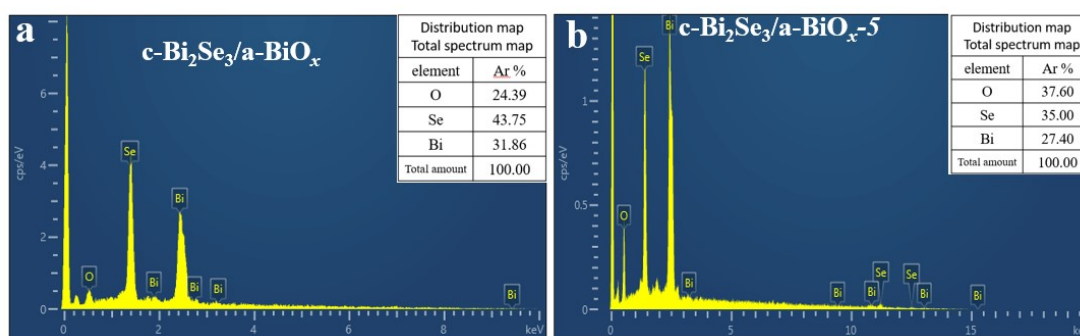

**Fig. S7.** EDS spectra of the (a) c-Bi<sub>2</sub>Se<sub>3</sub>/a-BiO<sub>x</sub> and (b) c-Bi<sub>2</sub>Se<sub>3</sub>/a-BiO<sub>x</sub>-5 products.



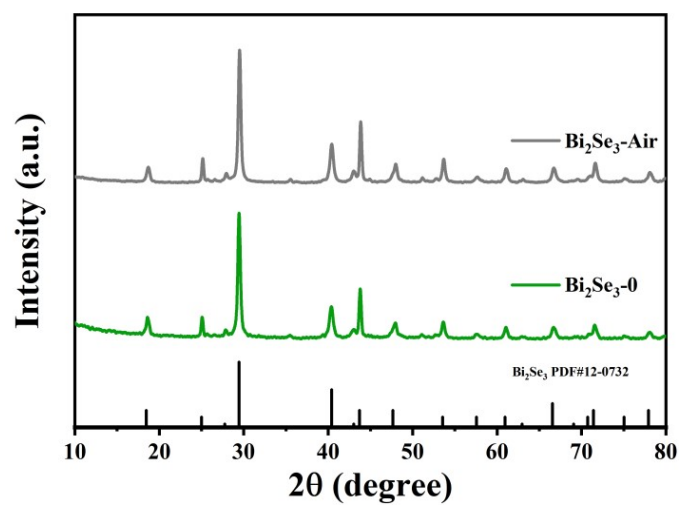

Fig. S8. XRD patterns of the  $\text{Bi}_2\text{Se}_3$  before and after exposed in air for 30 days.

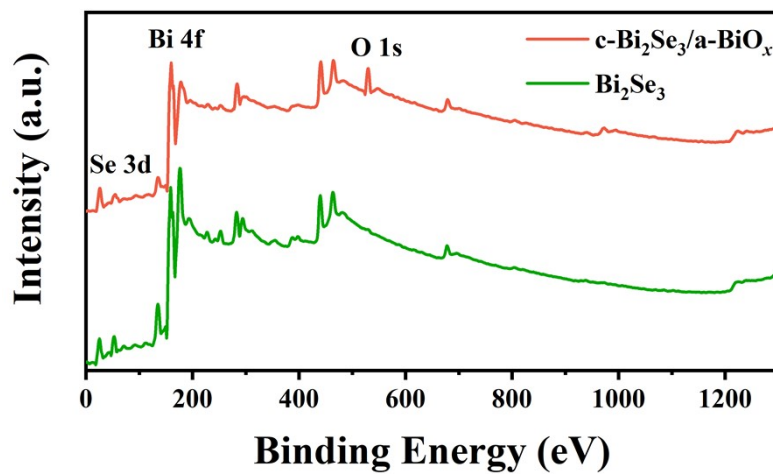

Fig. S9. XPS full spectra of the  $\text{Bi}_2\text{Se}_3$  and  $\text{c-Bi}_2\text{Se}_3/\text{a-BiO}_x$ .

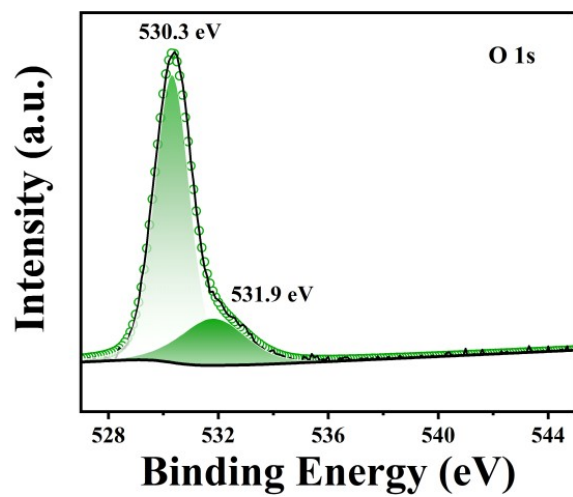

**Fig. S10.** High-resolution XPS O 1s spectrum of the c-Bi<sub>2</sub>Se<sub>3</sub>/a-BiO<sub>x</sub>.

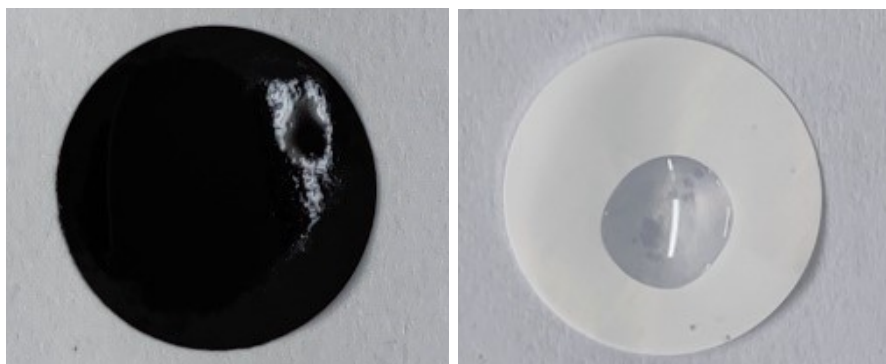

**Fig. S11** The electrolyte wettability test of PP and c-Bi<sub>2</sub>Se<sub>3</sub>/a-BiO<sub>x</sub>-PP separators.

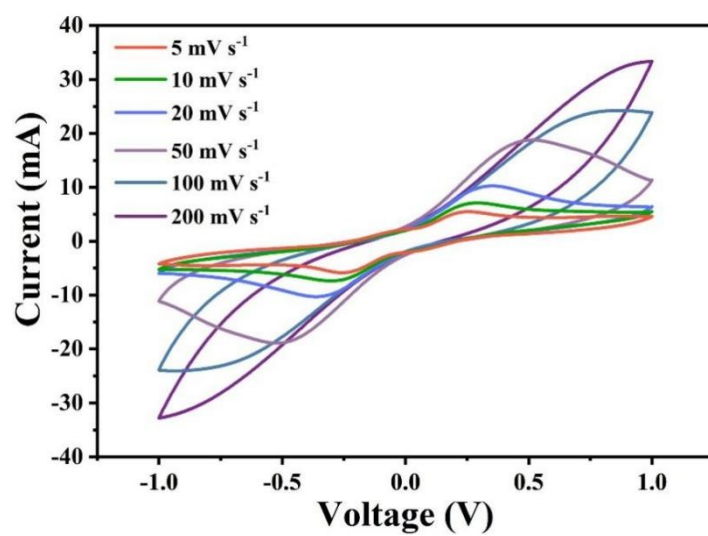

**Fig. S12.** CV curves of the  $\text{Li}_2\text{S}_6$  symmetrical cells with  $\text{c-Bi}_2\text{Se}_3/\text{a-BiO}_x$  at different scan rates.

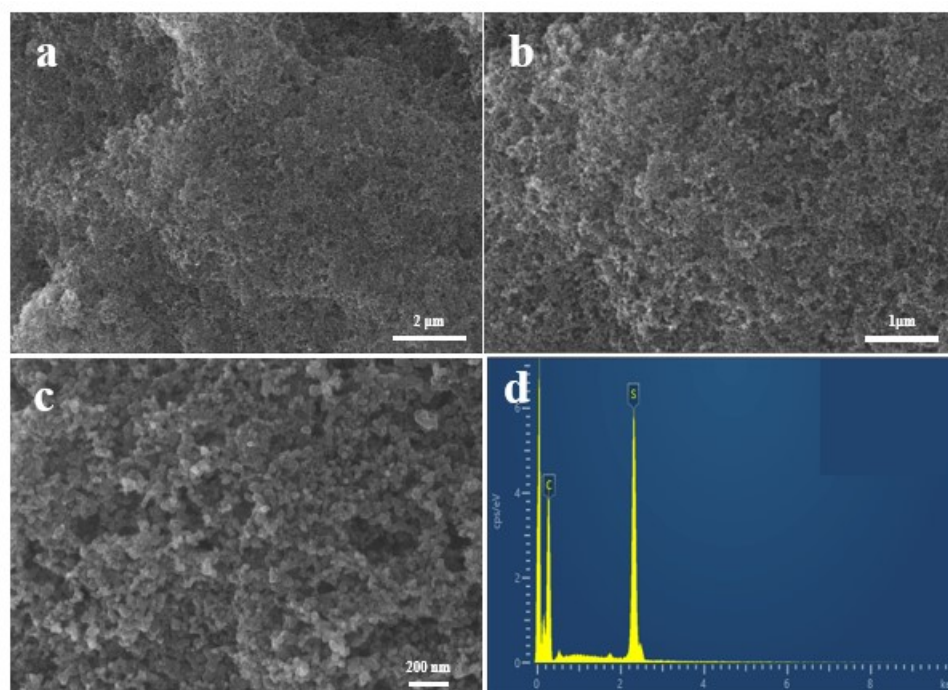

**Fig. S13.** (a-c) SEM images and (d) EDS spectrum of the KB/S composite.

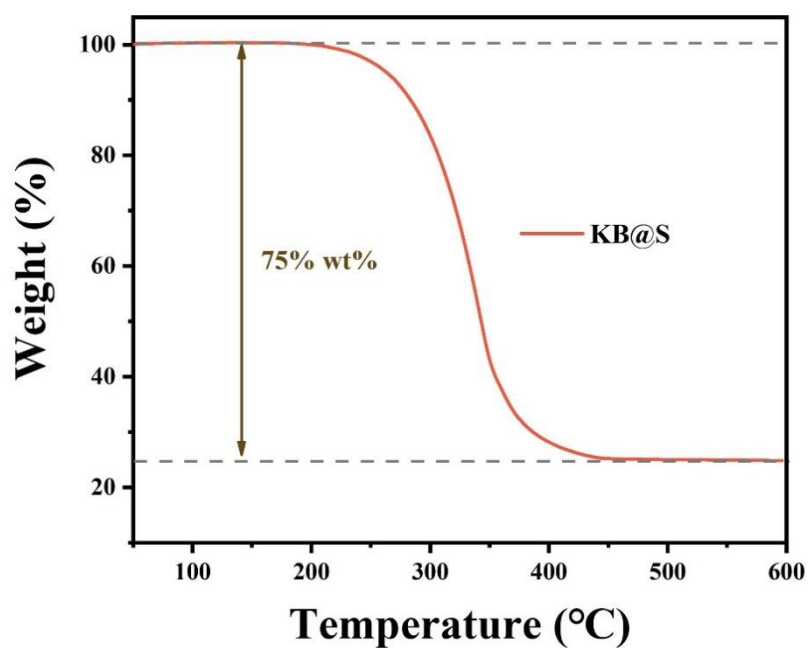

Fig. S14. TGA curve of the KB/S composite.

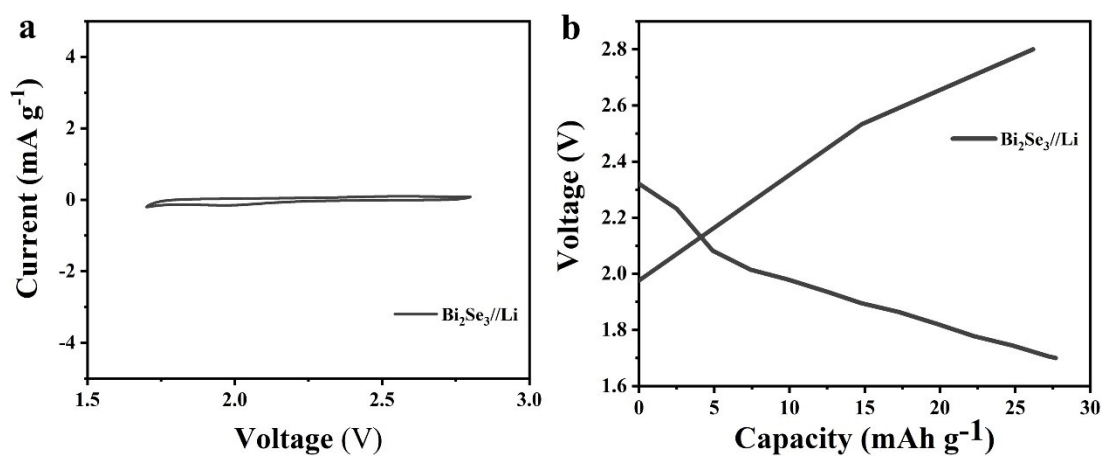

Fig. S15. (a) CV curve at  $0.2 \text{ mV s}^{-1}$  and (b) GCD curve at  $0.2 \text{ C}$  of the c-Bi<sub>2</sub>Se<sub>3</sub>/a-BiO<sub>x</sub>.

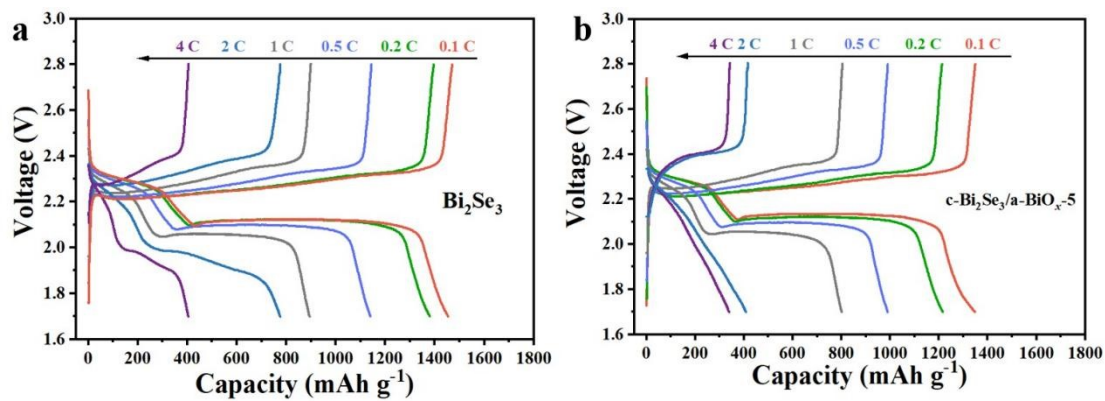

**Fig. S16.** GCD curves of the (a) Bi<sub>2</sub>Se<sub>3</sub> and (b) c-Bi<sub>2</sub>Se<sub>3</sub>/a-BiO<sub>x</sub>-5 batteries at various rates.

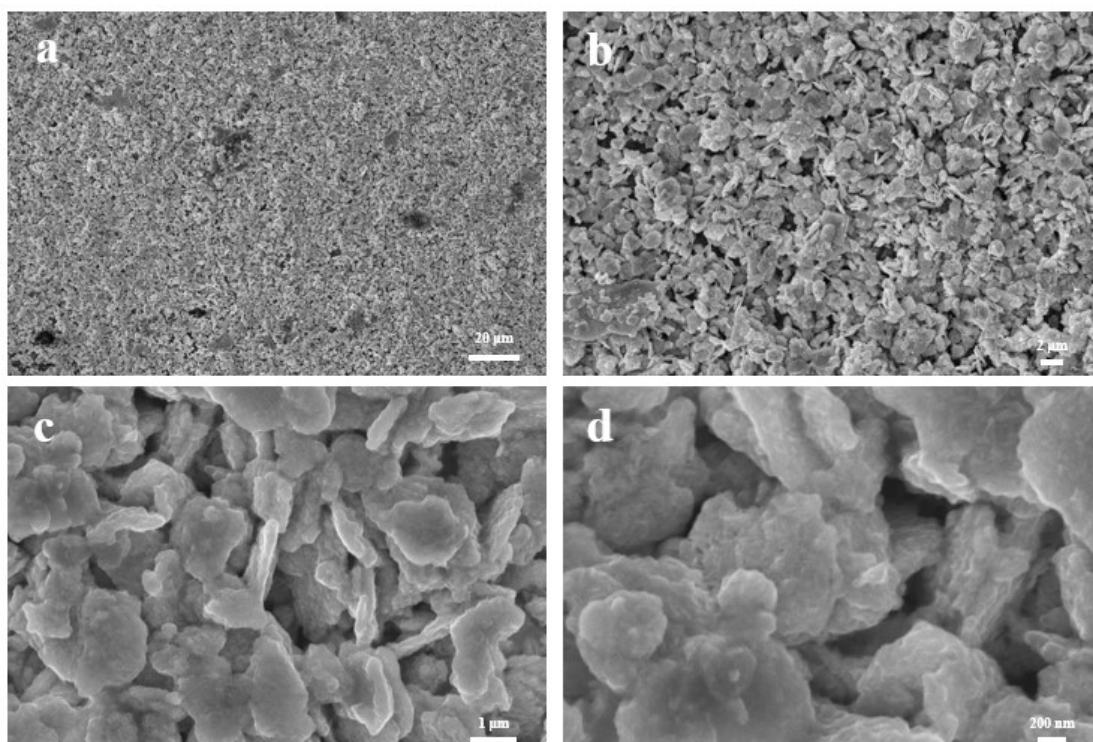

**Fig. S17.** (a-d) SEM images of the c-Bi<sub>2</sub>Se<sub>3</sub>/a-BiO<sub>x</sub>-PP after 100 cycles.

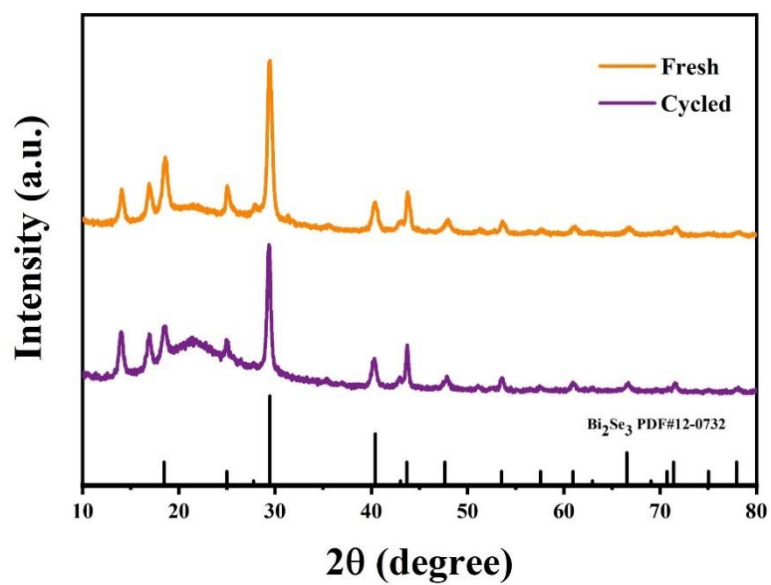

**Fig. S18.** XRD patterns of the c-Bi<sub>2</sub>Se<sub>3</sub>/a-BiO<sub>x</sub>-PP before and after cycling.

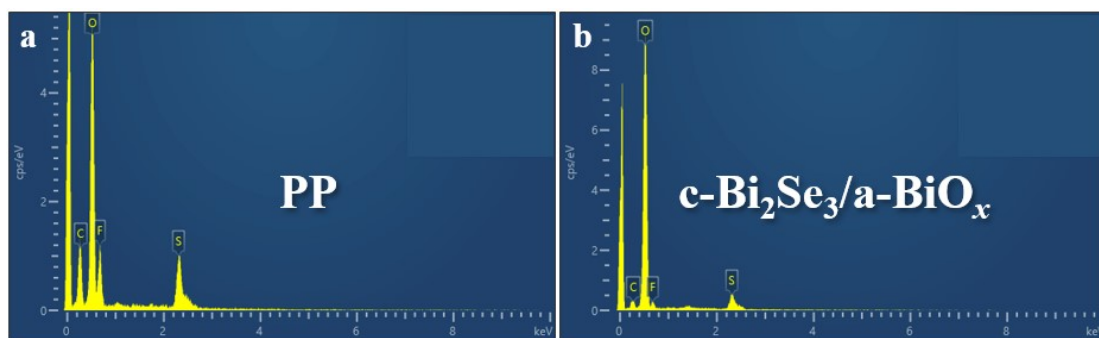

**Fig. S19.** EDS spectra of the surface of Li anode after 100 cycles with (a) PP and (b) c-Bi<sub>2</sub>Se<sub>3</sub>/a-BiO<sub>x</sub>-PP.

**Table S1.** Lithium-ion diffusion rates ( $D_{Li^+}$ ,  $\text{cm}^2 \text{s}^{-1}$ ) of the Li-S batteries with different separators.

| <b>Sample</b>                                         | <b>Peak A</b>         | <b>Peak B</b>         | <b>Peak C</b>         |
|-------------------------------------------------------|-----------------------|-----------------------|-----------------------|
| <b>PP</b>                                             | $1.81 \times 10^{-8}$ | $1.72 \times 10^{-8}$ | $0.99 \times 10^{-7}$ |
| c-Bi <sub>2</sub> Se <sub>3</sub> /a-BiO <sub>x</sub> | $9.04 \times 10^{-8}$ | $2.87 \times 10^{-7}$ | $6.94 \times 10^{-7}$ |
| Bi <sub>2</sub> Se <sub>3</sub>                       | $8.94 \times 10^{-8}$ | $1.34 \times 10^{-7}$ | $4.81 \times 10^{-7}$ |

**Table S2.** Comparison of the electrochemical performance of this work with recently reported Li-S batteries.

| Modified materials                                        | Sulfur loading (mg cm <sup>-2</sup> ) | Long cycle Stability (mAh g <sup>-1</sup> ) | Capacity Decay Rate (cycle <sup>-1</sup> ) | Low rate (Initial capacity) mAh g <sup>-1</sup> | High rate (Initial capacity) mAh g <sup>-1</sup> | Ref.             |
|-----------------------------------------------------------|---------------------------------------|---------------------------------------------|--------------------------------------------|-------------------------------------------------|--------------------------------------------------|------------------|
| BNNs@CNFs                                                 | 1.2                                   | 500/1C/800                                  | 0.046%                                     | 1244 (0.1C)                                     | 450 (5C)                                         | 8                |
| Co <sub>9</sub> S <sub>8</sub>                            | 1.5                                   | 518/1C/500                                  | 0.077%                                     | 1276(0.1C)                                      | 706 (2C)                                         | 10               |
| ZnO-ZnS/rGO                                               | 1.0                                   | 636/1C/500                                  | 0.060%                                     | 1201 (0.2C)                                     | 749 (3C)                                         | 14               |
| PE@CuS/CNTs                                               | 1.0                                   | 568/2C/1000                                 | 0.050%                                     | 1292 (0.1C)                                     | 868 (2C)                                         | 15               |
| Co/Mo <sub>2</sub> C                                      | 1.0                                   | 640/1C/600                                  | 0.072%                                     | 1186 (0.2C)                                     | 553 (4C)                                         | 48               |
| CoO/NiO@C-NC                                              | 1.2-1.4                               | 377/1C/500                                  | 0.075%                                     | 1343 (0.1C)                                     | 738 (3C)                                         | 49               |
| NiSA-N-PGC                                                | N.A.                                  | 480/0.5C/600                                | 0.069%                                     | 1299 (0.2C)                                     | 415 (1C)                                         | 50               |
| ZIF-67/SA-PAN                                             | 1.0                                   | 445/1C/500                                  | 0.089%                                     | 1187 (0.1C)                                     | 707 (2C)                                         | 51               |
| FeSC@NSC                                                  | 1.5-2.0                               | 466/1C/700                                  | 0.065%                                     | 1100 (0.1C)                                     | 483 (5C)                                         | 52               |
| Gr-MoSe <sub>2</sub> @GF                                  | ~1.3                                  | 390/2C/400                                  | 0.128%                                     | 1118 (0.2C)                                     | 553 (3C)                                         | 53               |
| MXene/MoS <sub>2</sub>                                    | 2.0                                   | 443/1C/500                                  | 0.056%                                     | 1336 (0.1C)                                     | 810 (2C)                                         | 54               |
| Co@N-CNTs/N-Mo <sub>x</sub> C                             | 1.0                                   | 610/1C/500                                  | 0.090%                                     | 1351 (0.1C)                                     | 496 (5C)                                         | 55               |
| CeO <sub>2</sub> /KB                                      | 1.3                                   | 300/2C/1000                                 | 0.060%                                     | 1242 (0.1C)                                     | 627 (3C)                                         | 56               |
| d-Ti <sub>3</sub> C <sub>2</sub> T <sub>x</sub> / Cu-TCPP | 1.5                                   | 313/0.5C/350                                | 0.186%                                     | 917 (0.1C)                                      | 504 (1C)                                         | 57               |
| MoN-Mo <sub>2</sub> N                                     | 0.4                                   | 622/1C/800                                  | 0.049%                                     | 1350 (0.2C)                                     | 698 (4C)                                         | 58               |
| CoSe@CNTs                                                 | N.A.                                  | 50/1C/800                                   | ~0.110%                                    | 1500 (0.1C)                                     | 655 (3C)                                         | 59               |
| m-Mn <sub>2</sub> O <sub>3</sub> /SP                      | 2.0                                   | 500/1C/200                                  | 0.250%                                     | 1100 (0.2C)                                     | 677 (2C)                                         | 60               |
| Ni <sub>3</sub> S <sub>2</sub> @C                         | N.A.                                  | 490/1C/600                                  | 0.080%                                     | 1229 (0.2C)                                     | 745 (2C)                                         | 61               |
| c-MoS <sub>2</sub>                                        | 1.5-2.0                               | 590/1C/500                                  | 0.082%                                     | 1301 (0.25C)                                    | 858 (5C)                                         | 62               |
| c-Bi <sub>2</sub> Se <sub>3</sub> /a-BiO <sub>x</sub>     | 1.0                                   | 612/1C/1000                                 | 0.041%                                     | 1518 (0.1C)                                     | 873 (4C)                                         | <b>This work</b> |



**Table S3.** Comparison of the electrochemical performance at high sulfur loading of this work with recently reported Li-S batteries.

| Electrocatalysts                                      | Sulfur loading (mg cm <sup>-2</sup> ) | E/S ratio | Rate/Cycles | Discharge capacity (mAh cm <sup>-2</sup> ) | Ref.             |
|-------------------------------------------------------|---------------------------------------|-----------|-------------|--------------------------------------------|------------------|
| Co <sub>9</sub> S <sub>8</sub>                        | 4.63                                  | 7         | 0.5C/100    | 2.99                                       | 10               |
| CuS                                                   | 4.5                                   | 9.4       | 1C/100      | 1.98                                       | 15               |
| MoS <sub>2</sub> /MoO <sub>3</sub>                    | 5.9                                   | -         | 0.2C/100    | 2.95                                       | 17               |
| ZnSe                                                  | 5.8                                   | -         | 0.5C/120    | 3.6                                        | 20               |
| NiS <sub>2</sub> /WS <sub>2</sub>                     | 4.1                                   | -         | 0.1C/100    | 3.2                                        | 31               |
| I-Bi <sub>2</sub> Se <sub>3</sub>                     | 5.2                                   | 8         | 0.5C/300    | 3.0                                        | 44               |
| ZIF-67/SA-PAN                                         | 5.45                                  | -         | 0.1C/100    | 3.7                                        | 51               |
| Co@N-CNTs/<br>N-Mo <sub>x</sub> C                     | 4.4                                   | 10        | 0.1C/100    | 3.21                                       | 55               |
| CeO <sub>2</sub> /KB                                  | 6.6                                   | -         | 0.2C/100    | 3.6                                        | 56               |
| MXene/<br>Cu-TCPP                                     | 3.45                                  | 9.13      | 0.05C/30    | 2.7                                        | 57               |
| MoN-Mo <sub>2</sub> N                                 | 5.1                                   | 5         | 0.1C/100C   | 2.8                                        | 58               |
| TiO@C-HS                                              | 4.0                                   | -         | 0.1C/50     | 2.9                                        | 65               |
| c-Bi <sub>2</sub> Se <sub>3</sub> /a-BiO <sub>x</sub> | 5.5                                   | 7.3       | 0.2C/100    | 3.85                                       | <b>This work</b> |
